# Supplementary material
Source: ML conference proceedings conference paper supplement (https://www.ecva.net/papers/eccv_2020/papers_ECCV/html/123600392_ECCV_2020_paper.php)

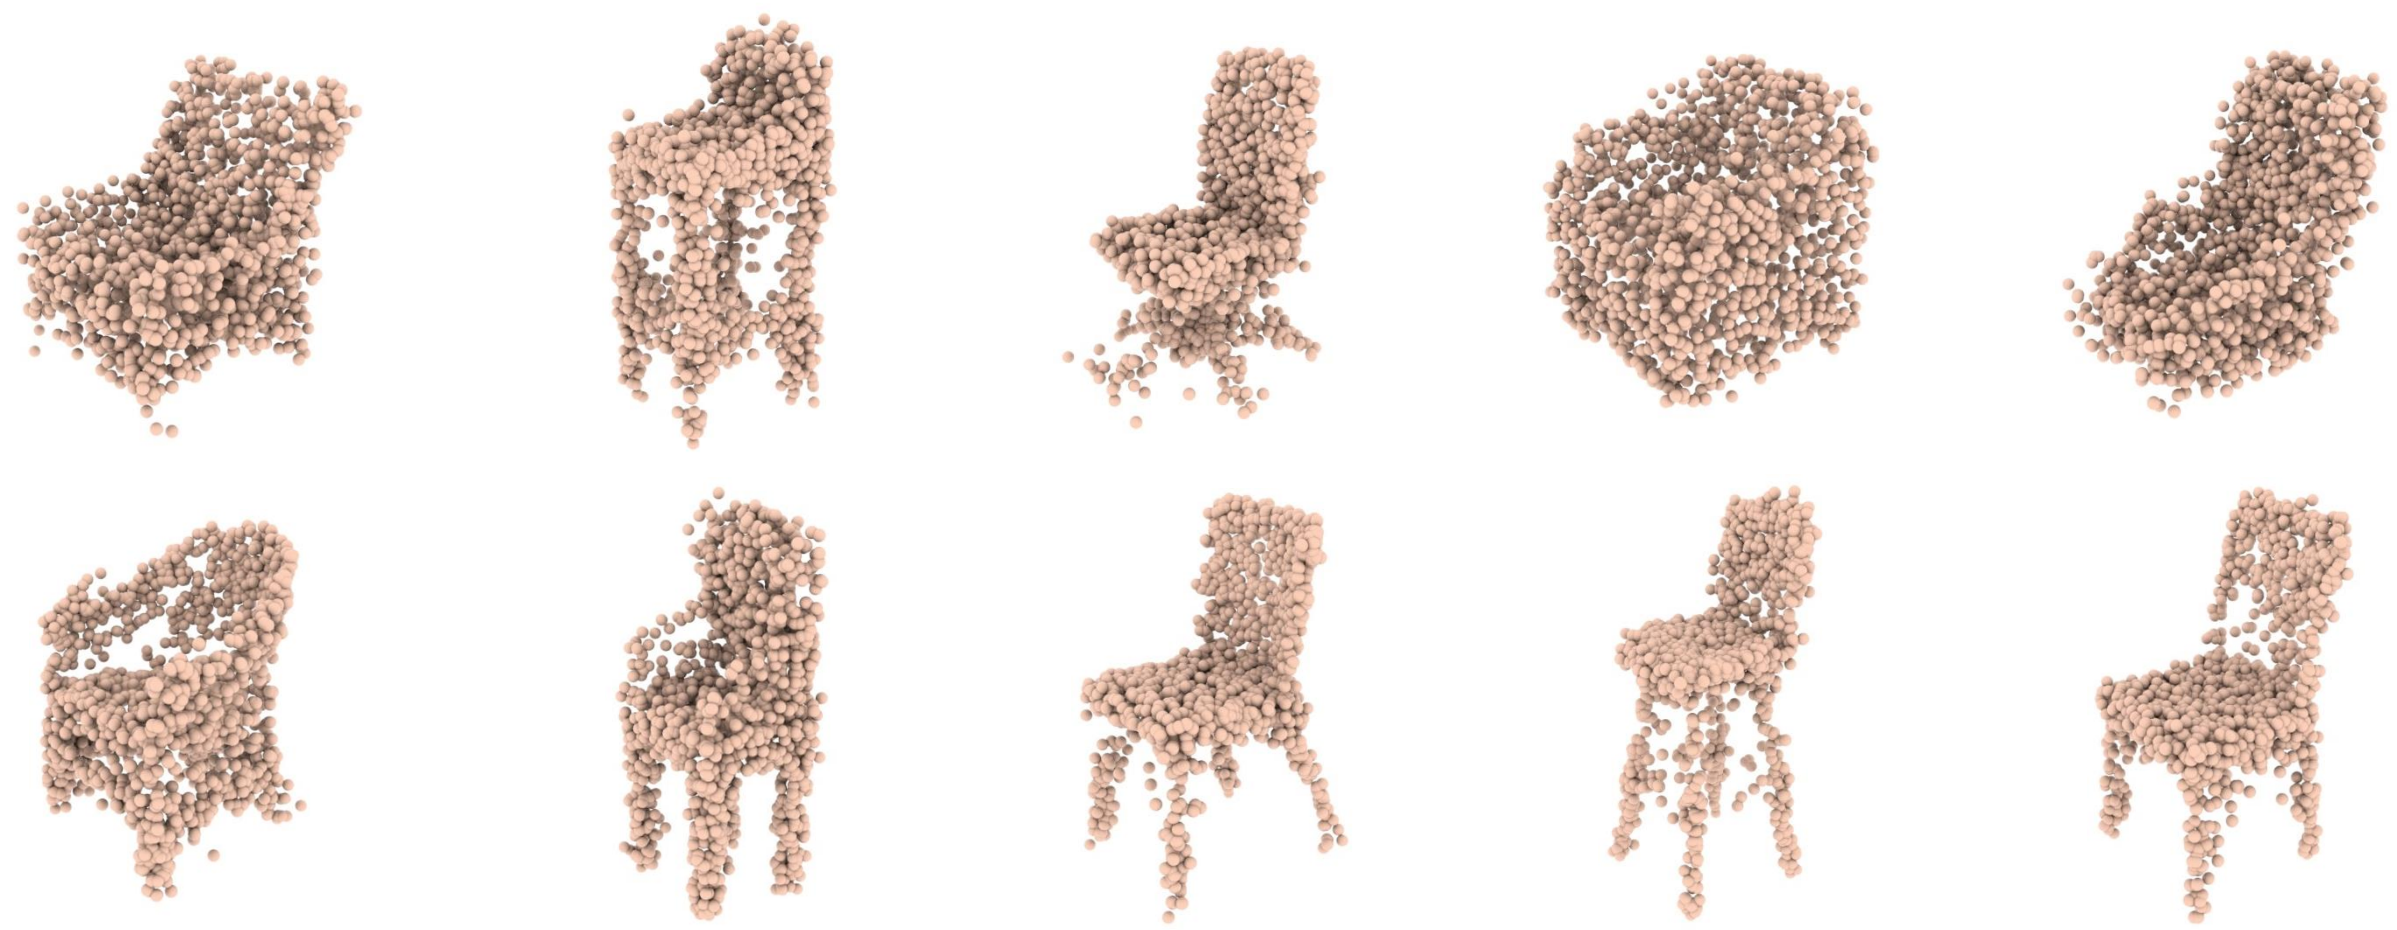

PointFlow

Supplement: Supplementary file 2 [file 123600392-supp.zip]

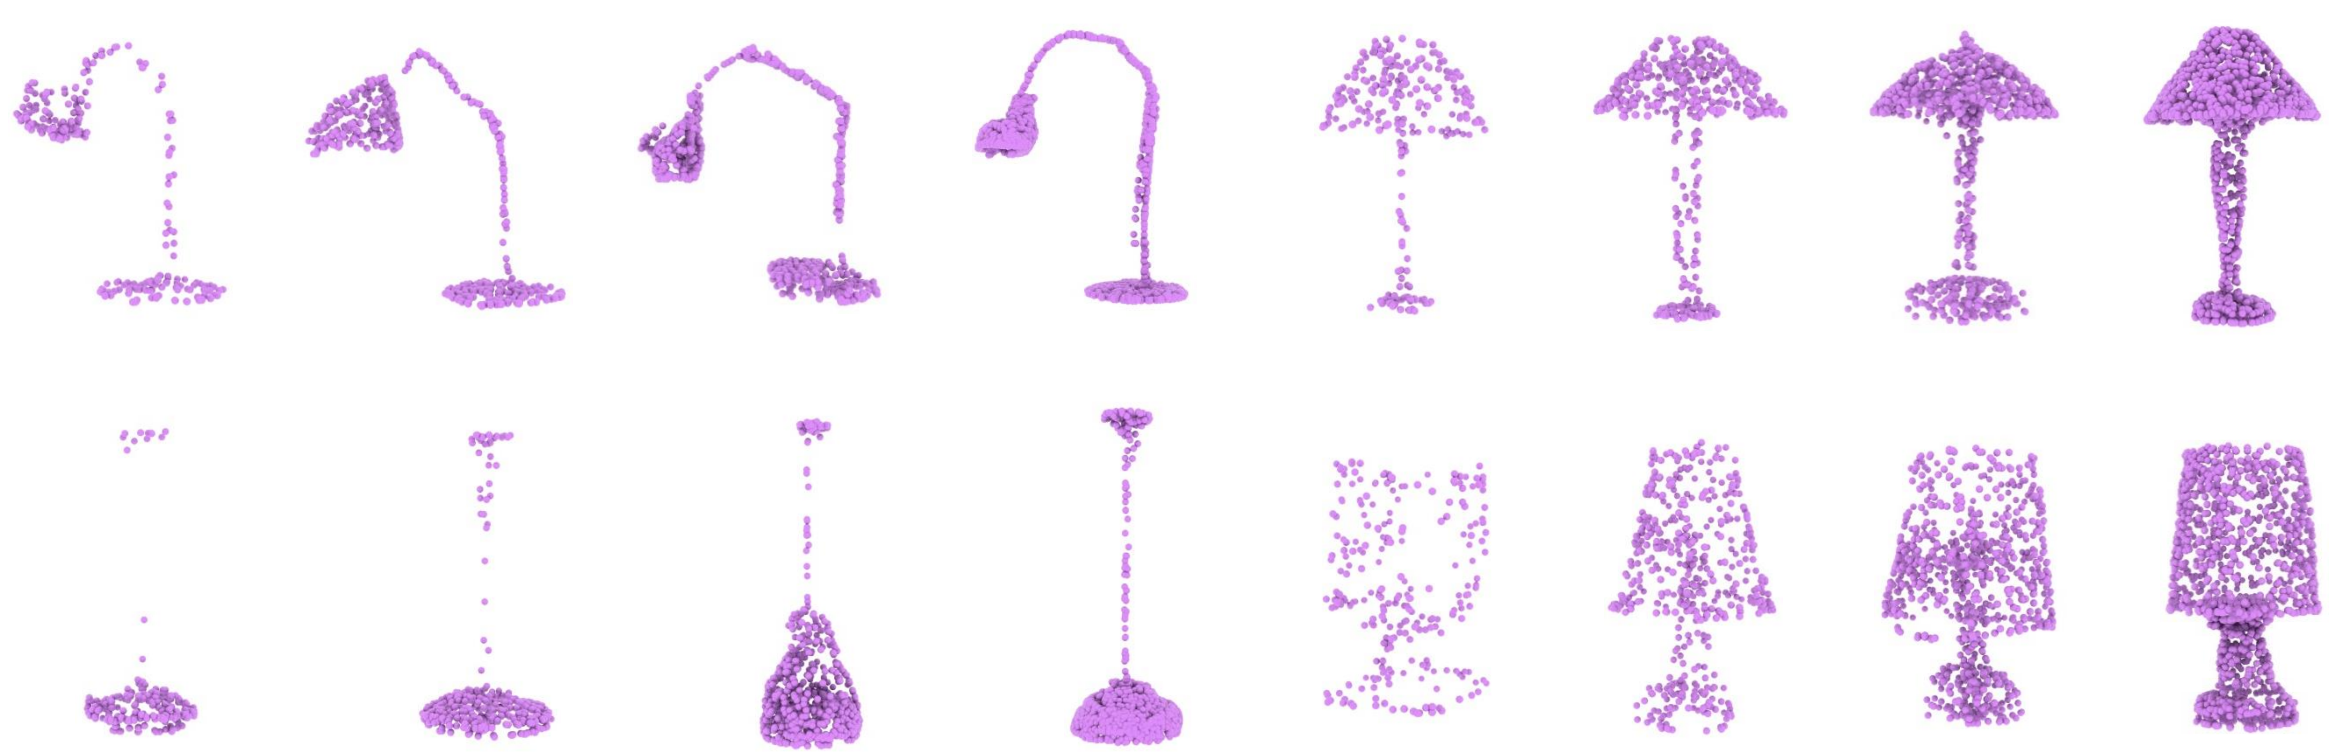

Supplement: Supplementary file 3 [file 123600392-supp.zip]

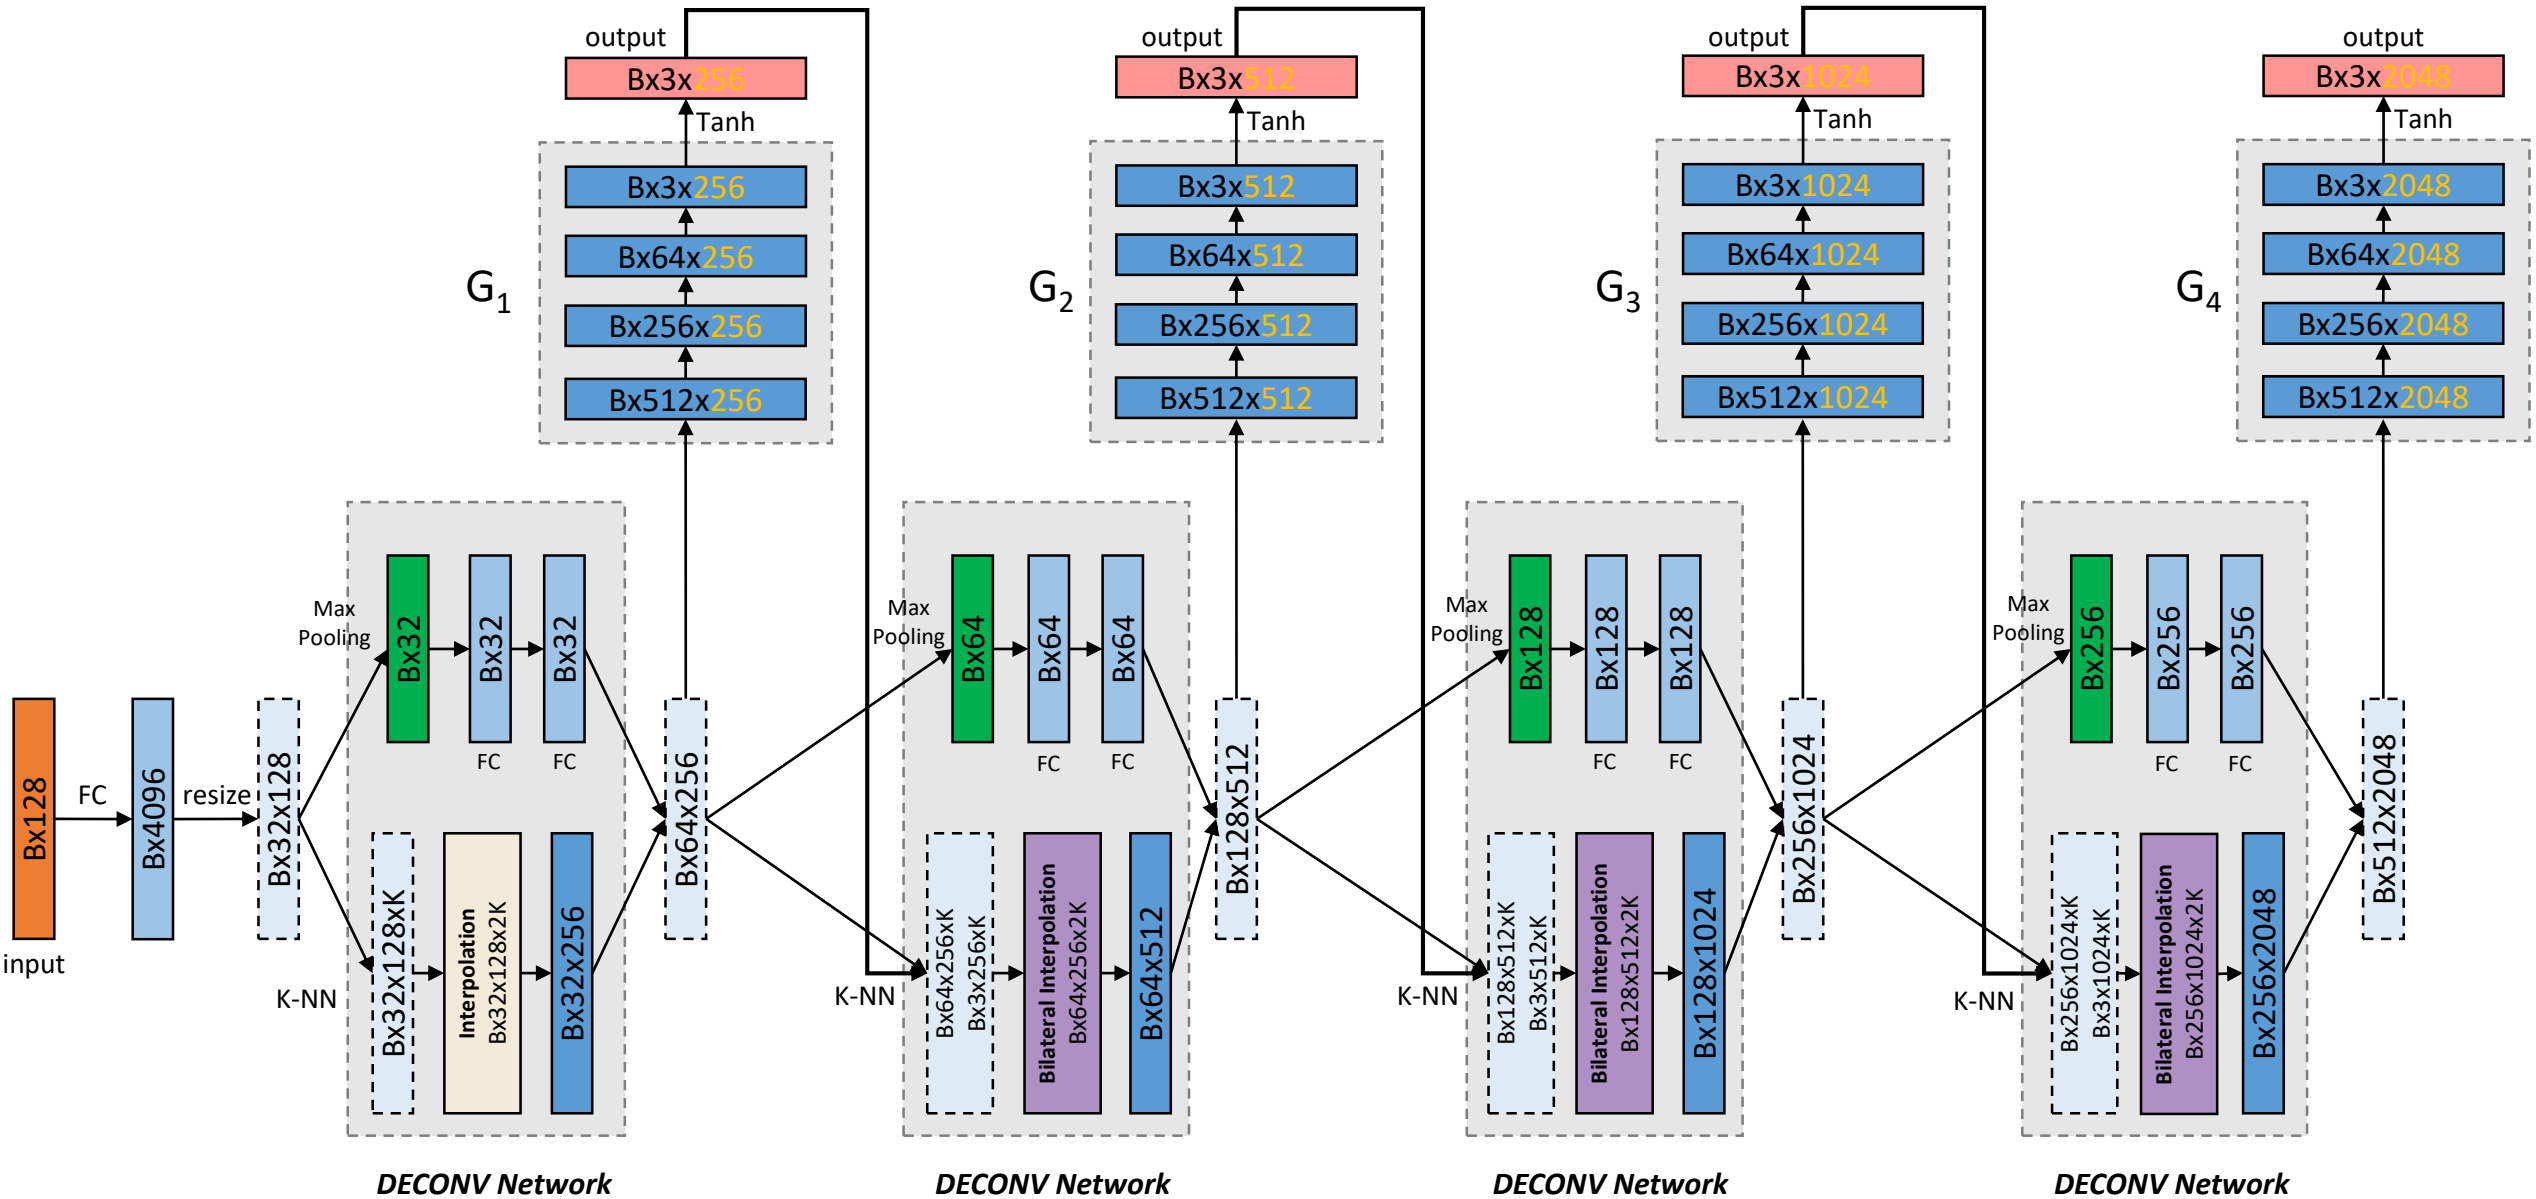

**Progressive Deconvolution Generator**

Supplement: Supplementary file 4 [file 123600392-supp.zip]

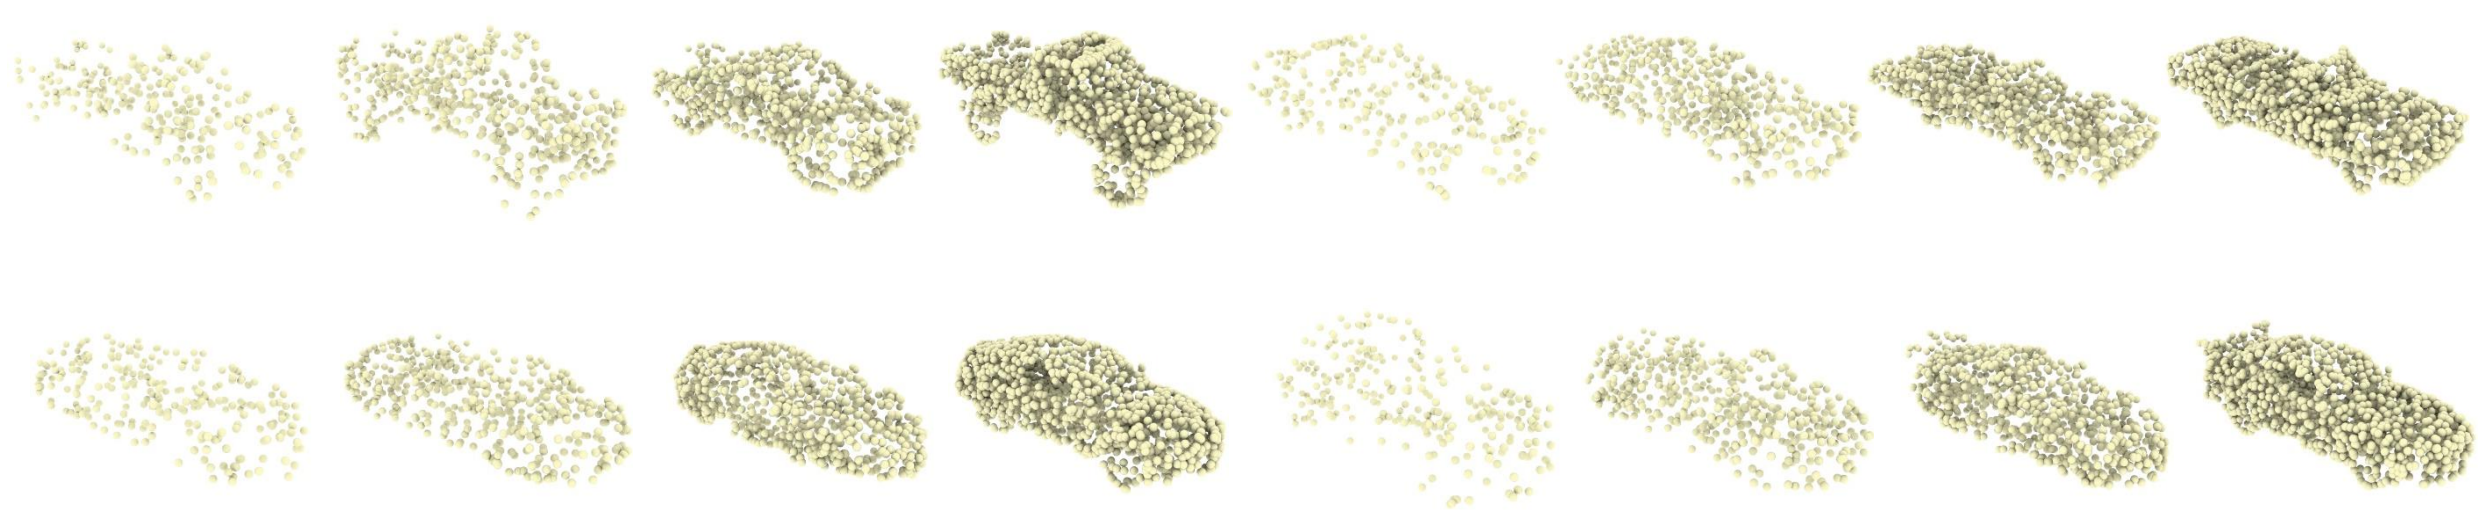

Supplement: Supplementary file 5 [file 123600392-supp.zip]

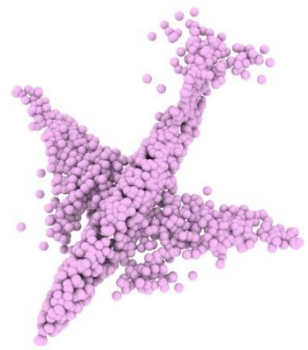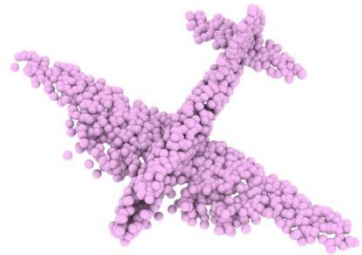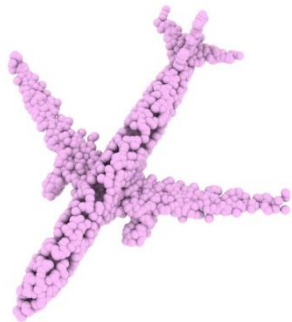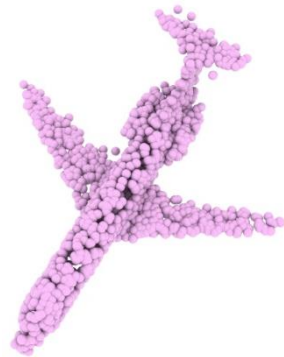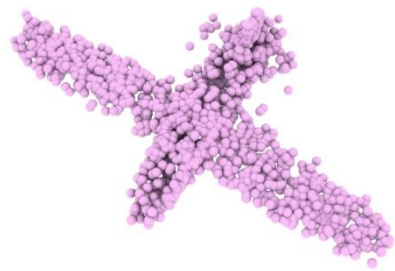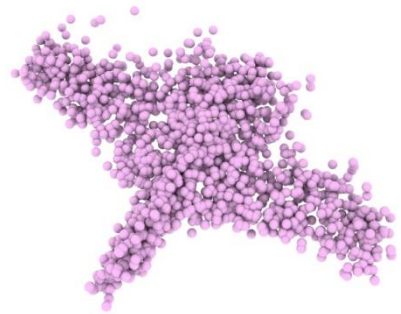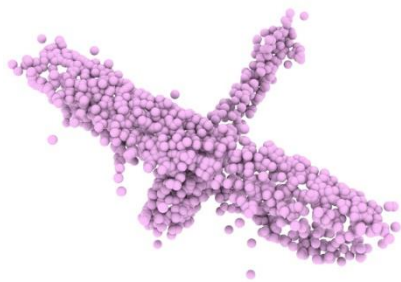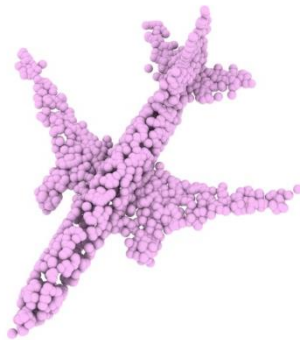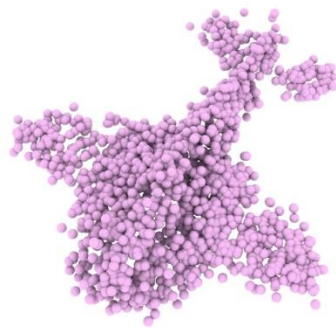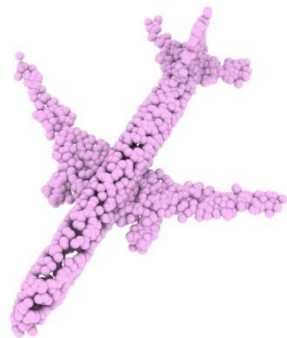

PointFlow

Supplement: Supplementary file 6 [file 123600392-supp.zip]

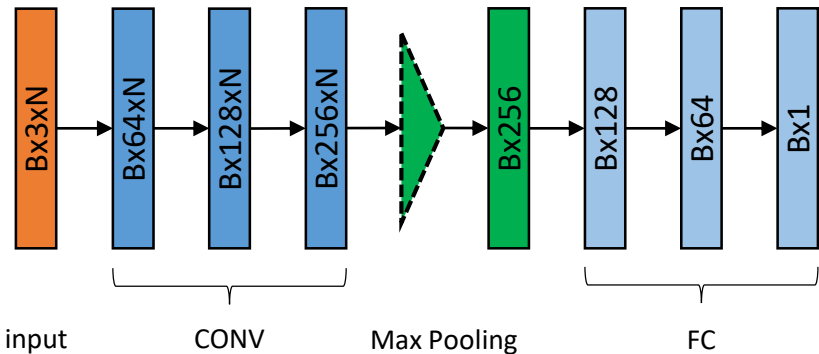

$D_1$  (N=256)

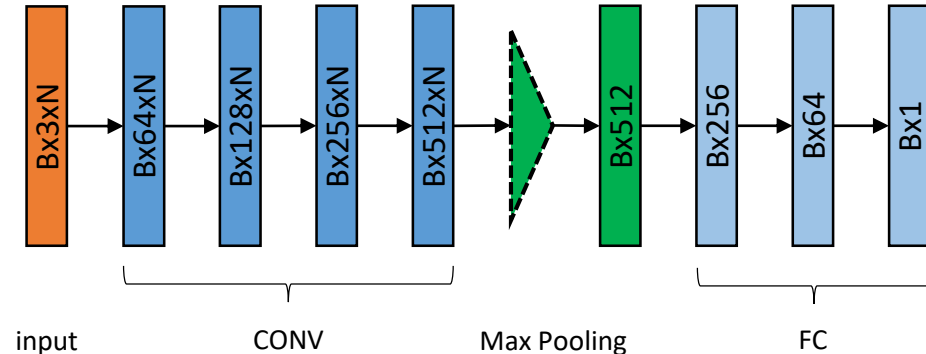

$D_2$  (N=512)

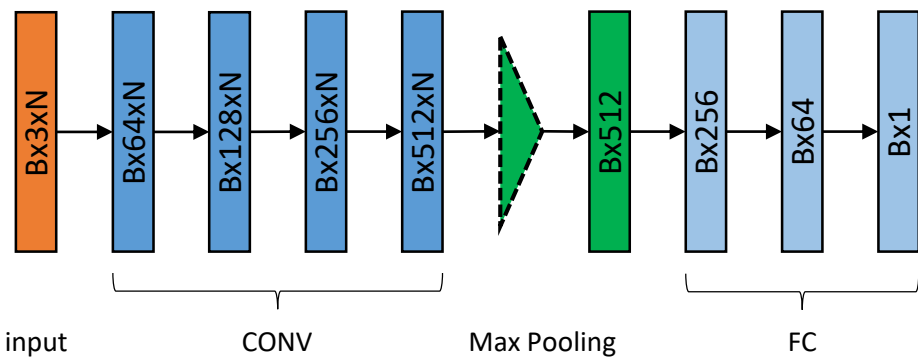

$D_3$  (N=1024)

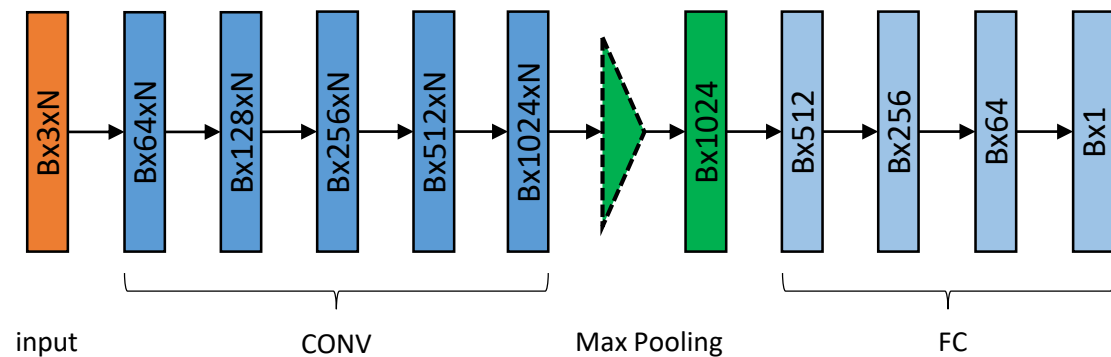

$D_4$  (N=2048)

## Discriminator

Supplement: Supplementary file 7 [file 123600392-supp.zip]

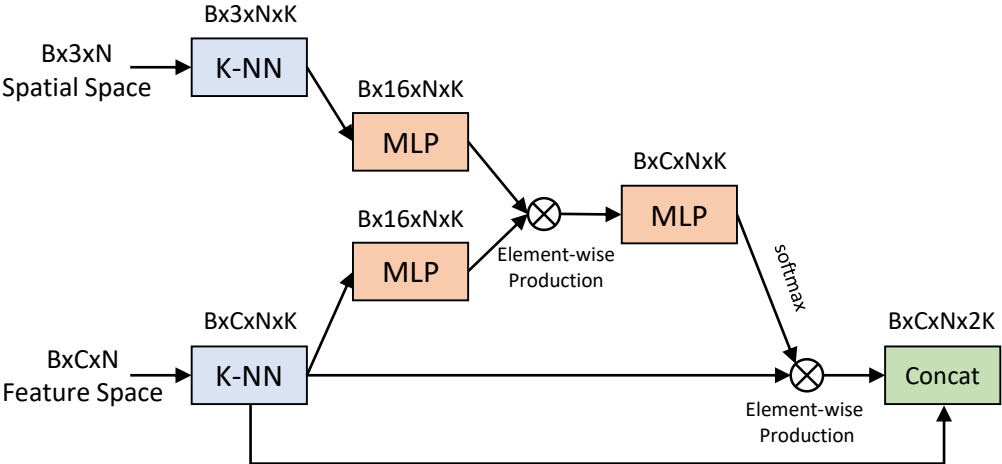

**Bilateral Interpolation**

Supplement: Supplementary file 8 [file 123600392-supp.zip]

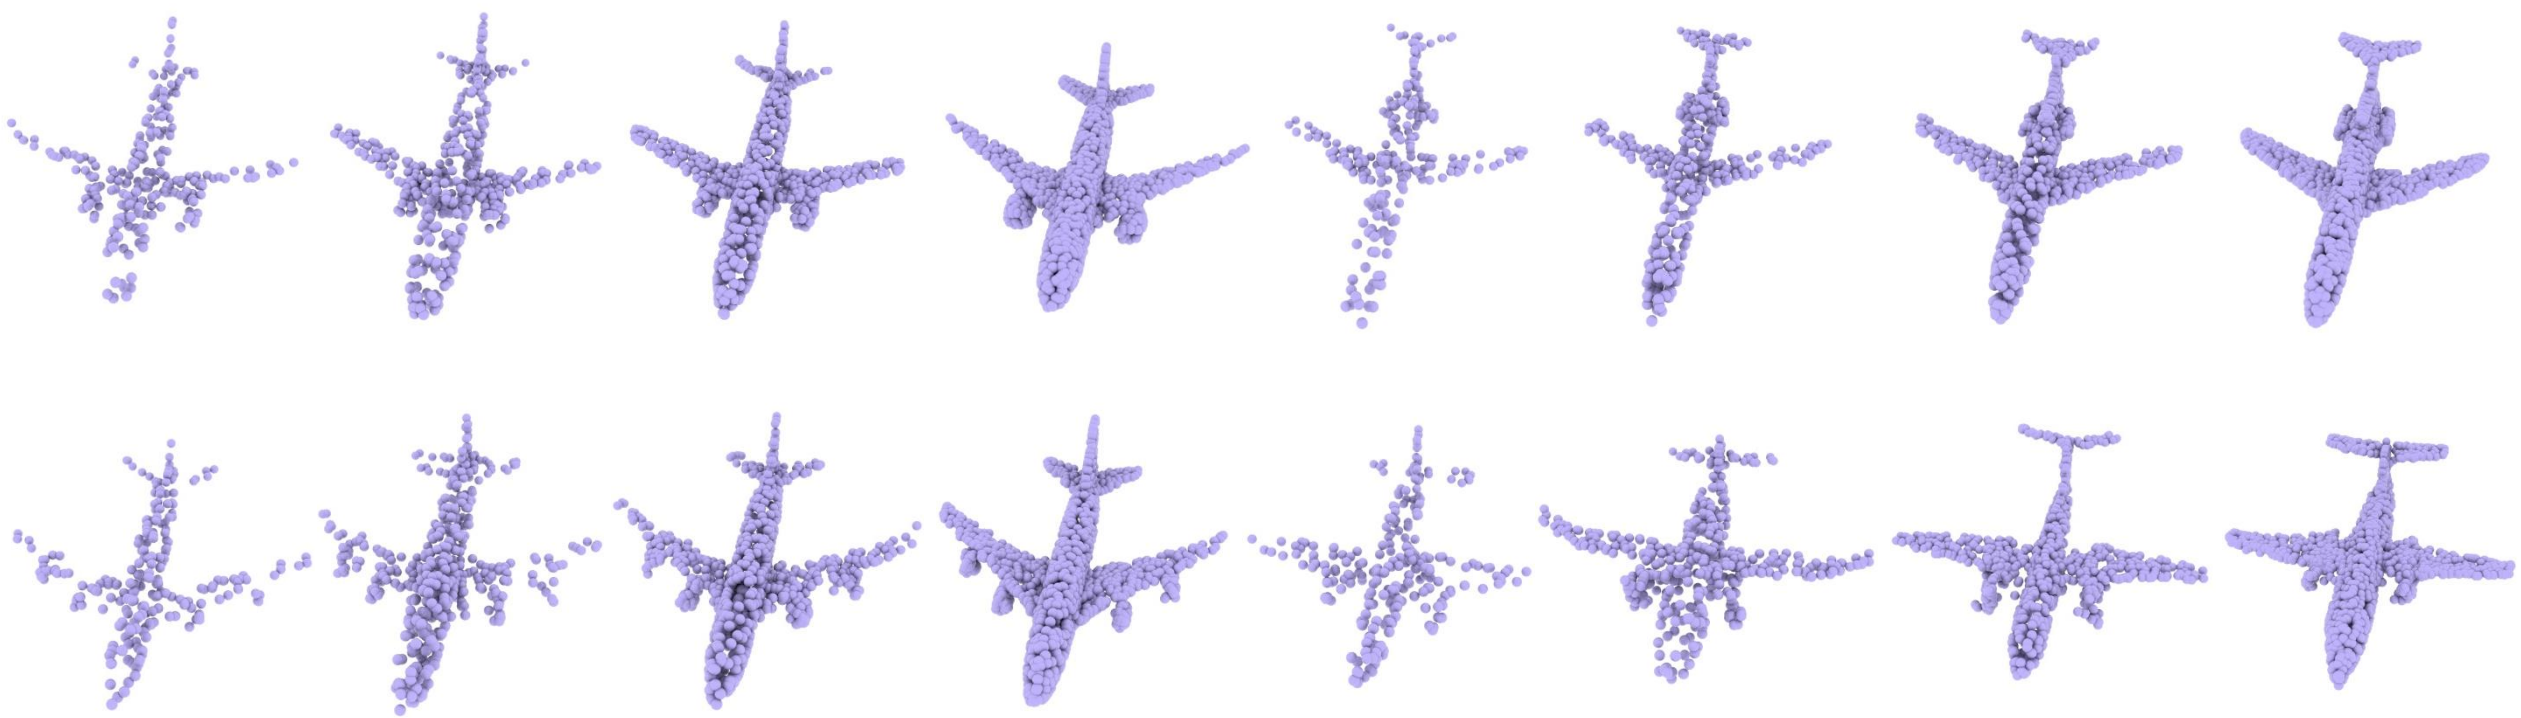

Supplement: Supplementary file 9 [file 123600392-supp.zip]

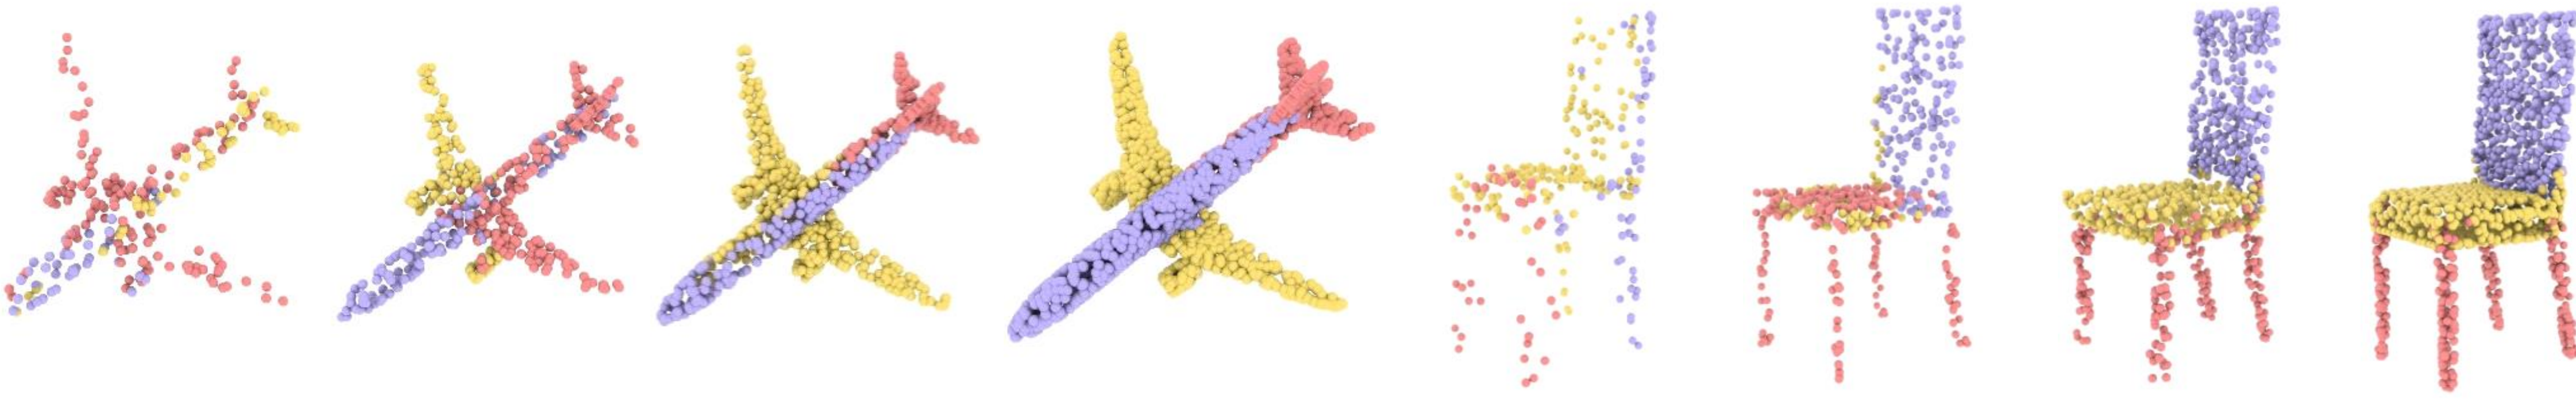

Supplement: Supplementary file 10 [file 123600392-supp.zip]

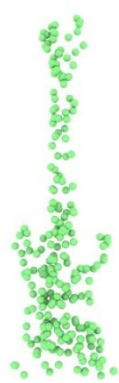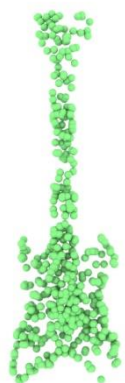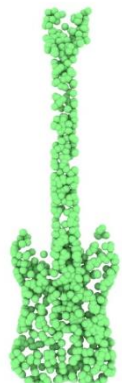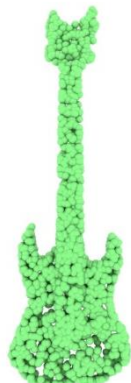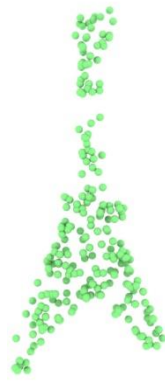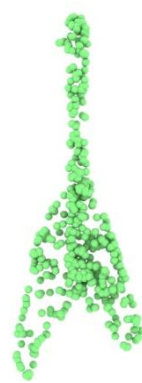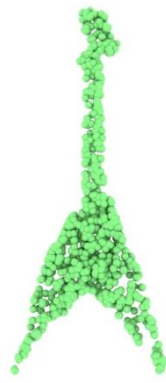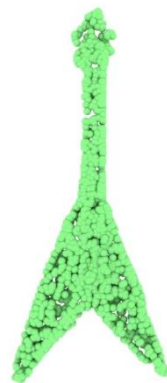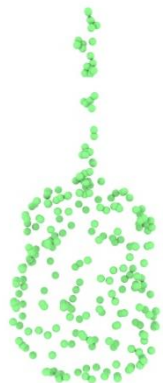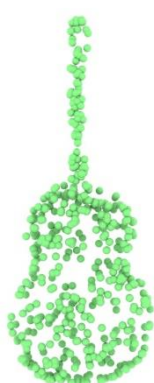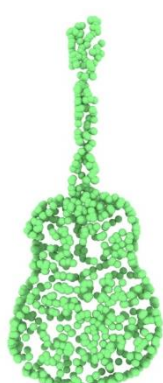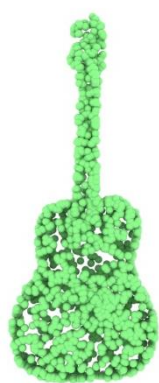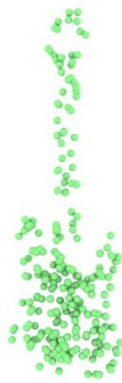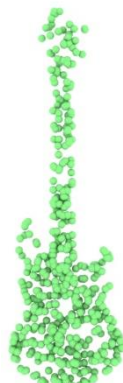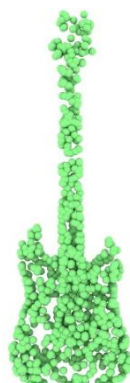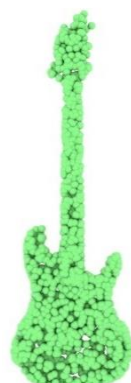

Supplement: Supplementary file 11 [file 123600392-supp.zip]

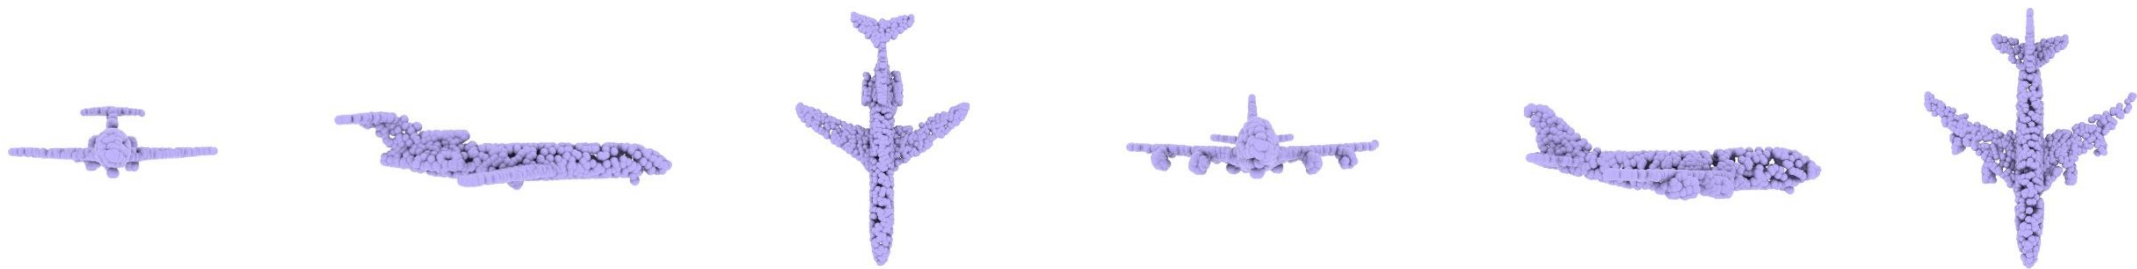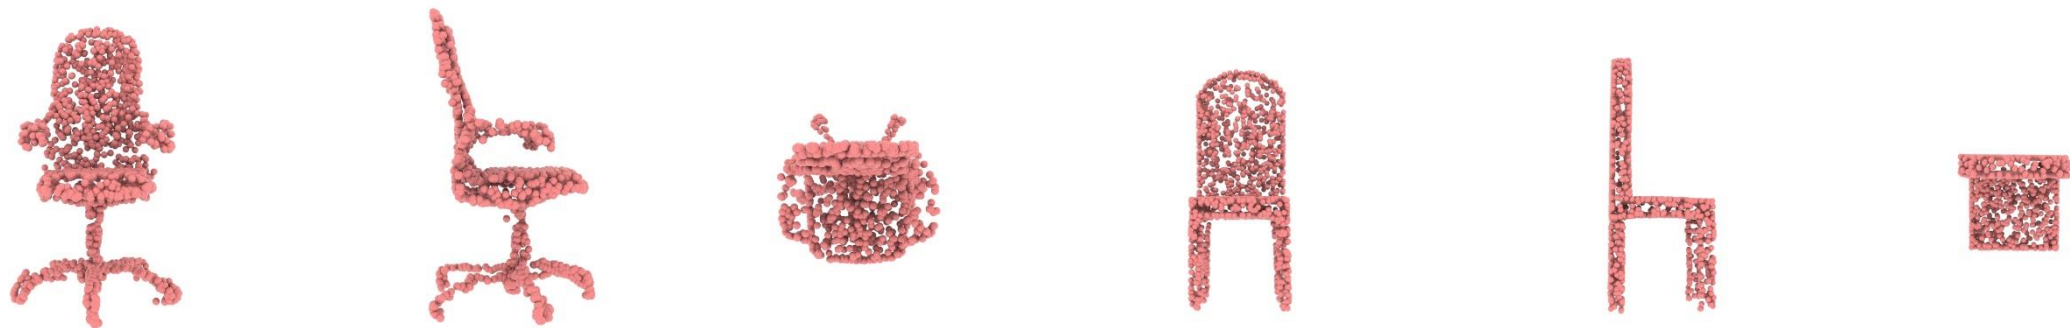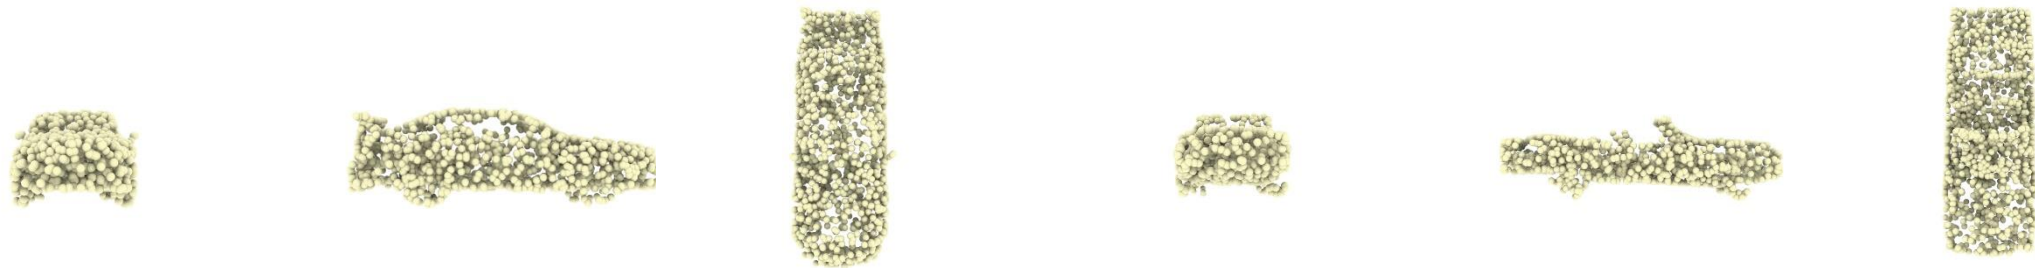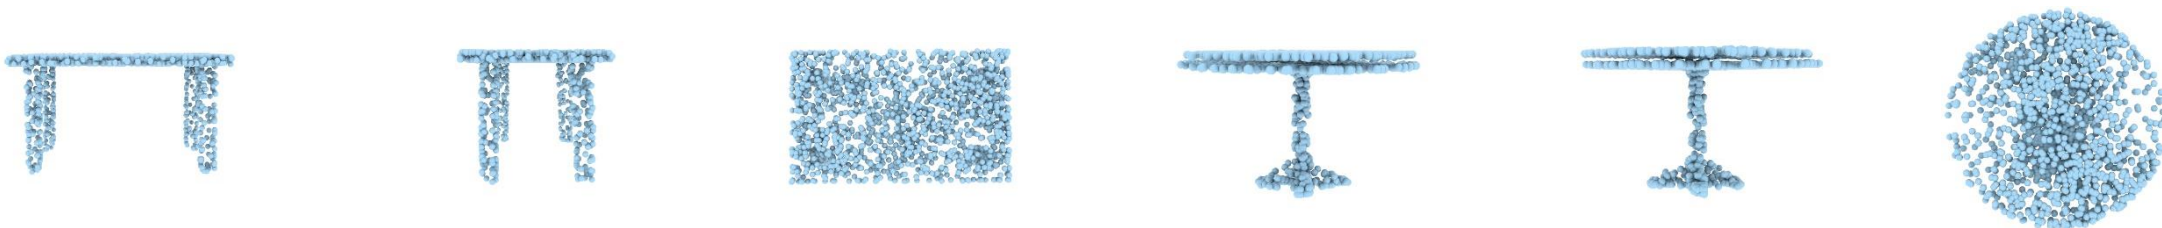

Supplement: Supplementary file 12 [file 123600392-supp.zip]

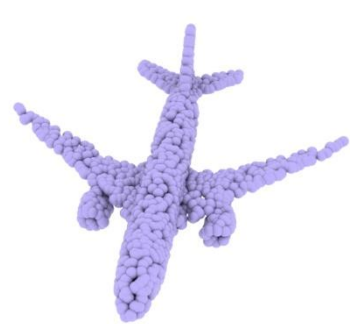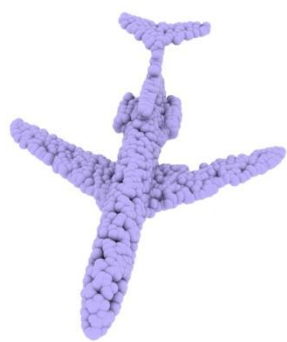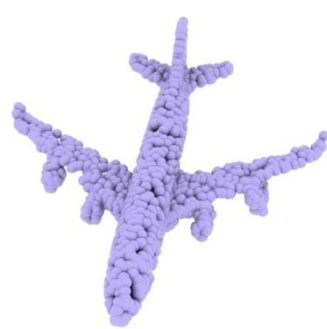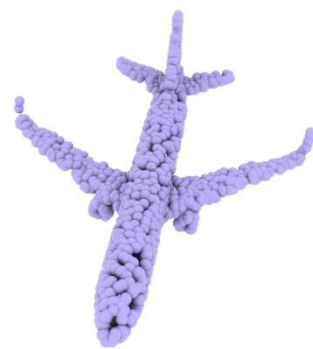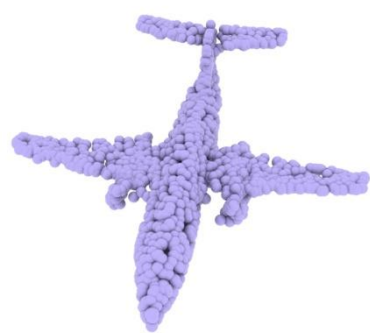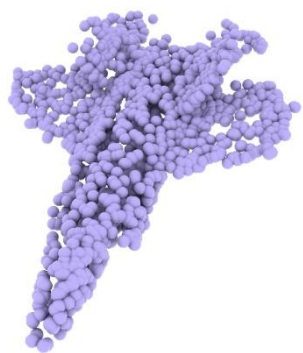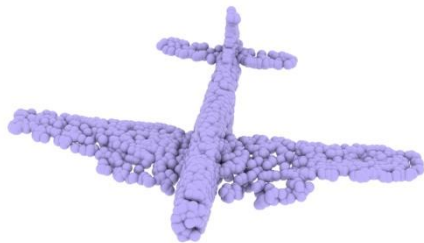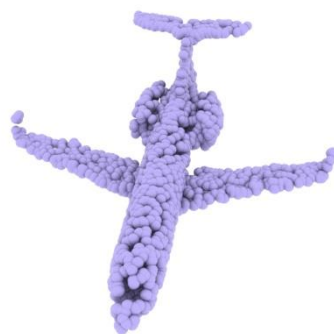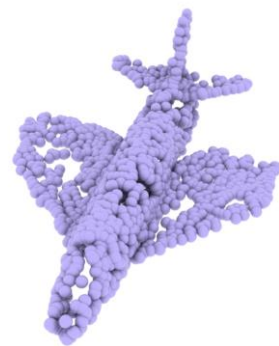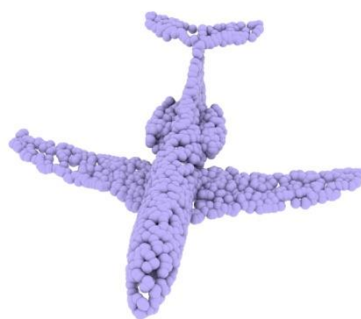

Ours

Supplement: Supplementary file 13 [file 123600392-supp.zip]

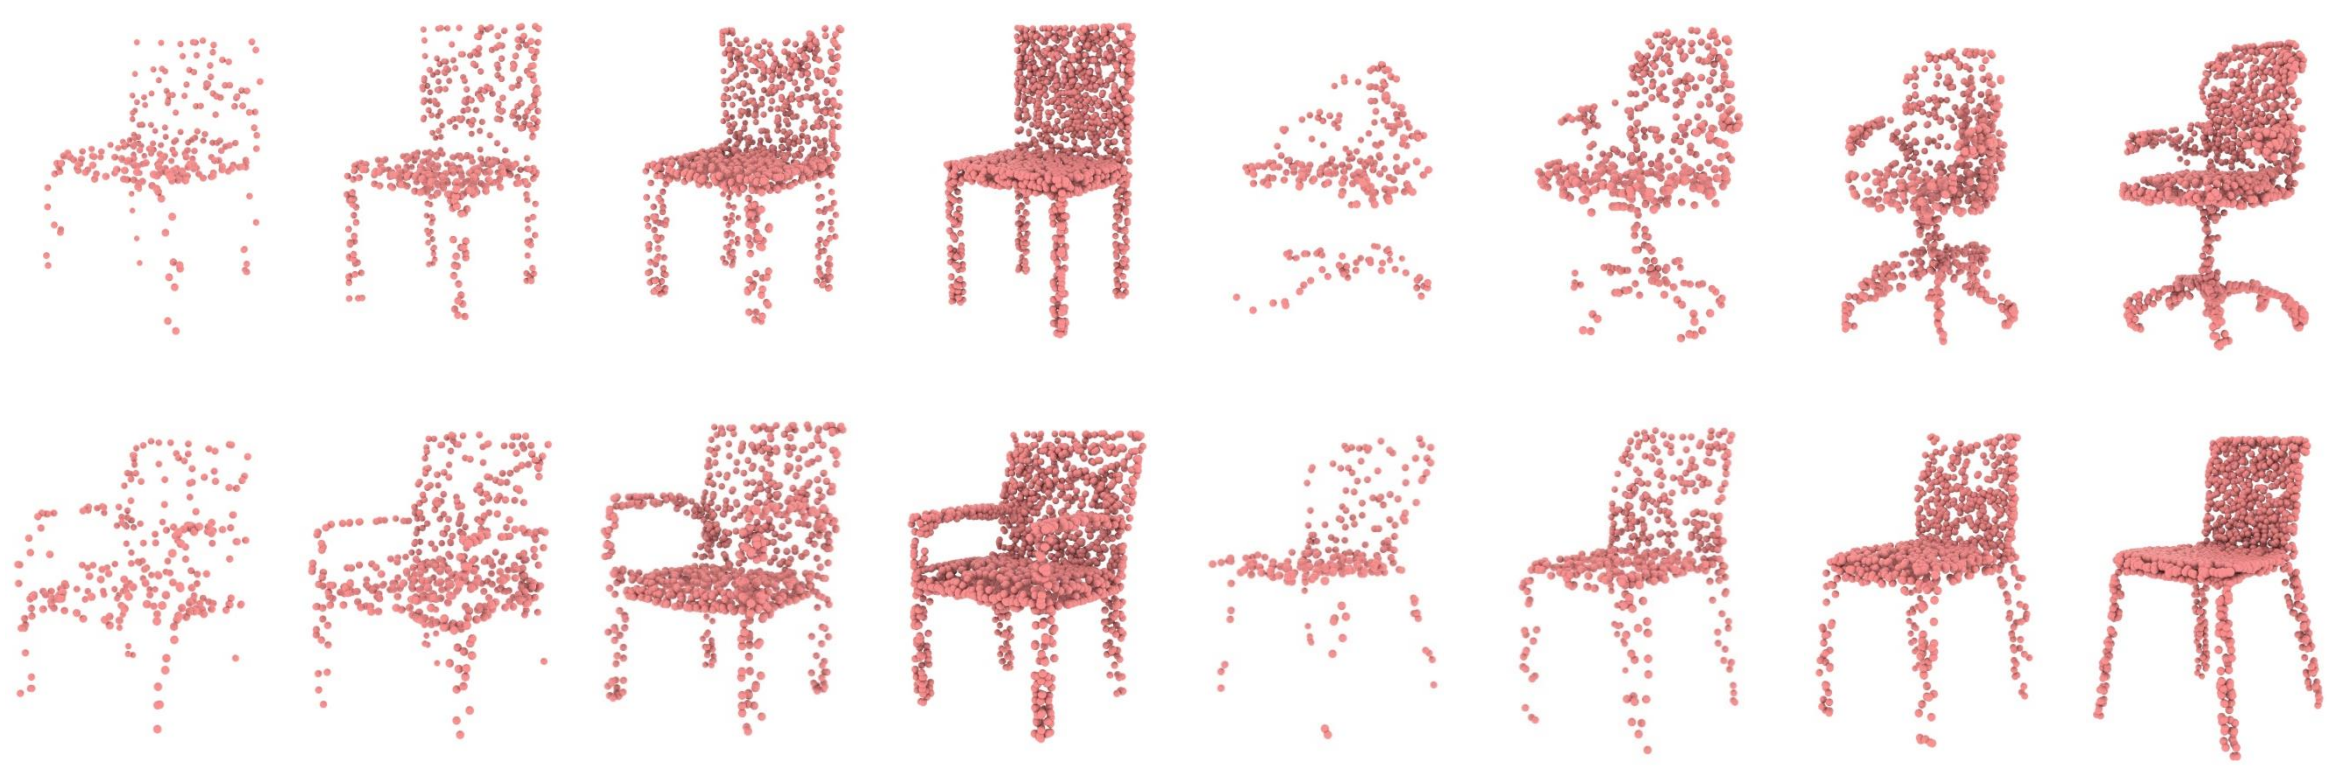

Supplement: Supplementary file 14 [file 123600392-supp.zip]

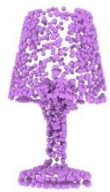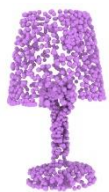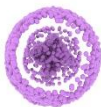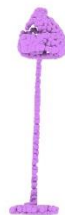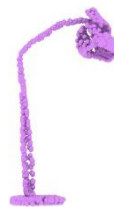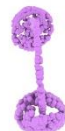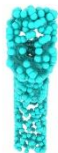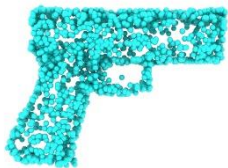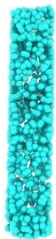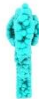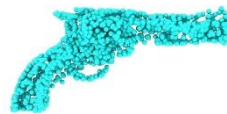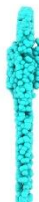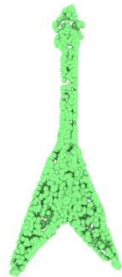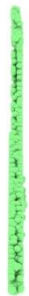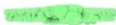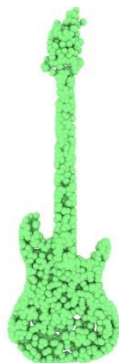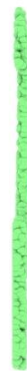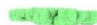

Main view

Left view

Top view

Main view

Left view

Top view

Supplement: Supplementary file 15 [file 123600392-supp.zip]

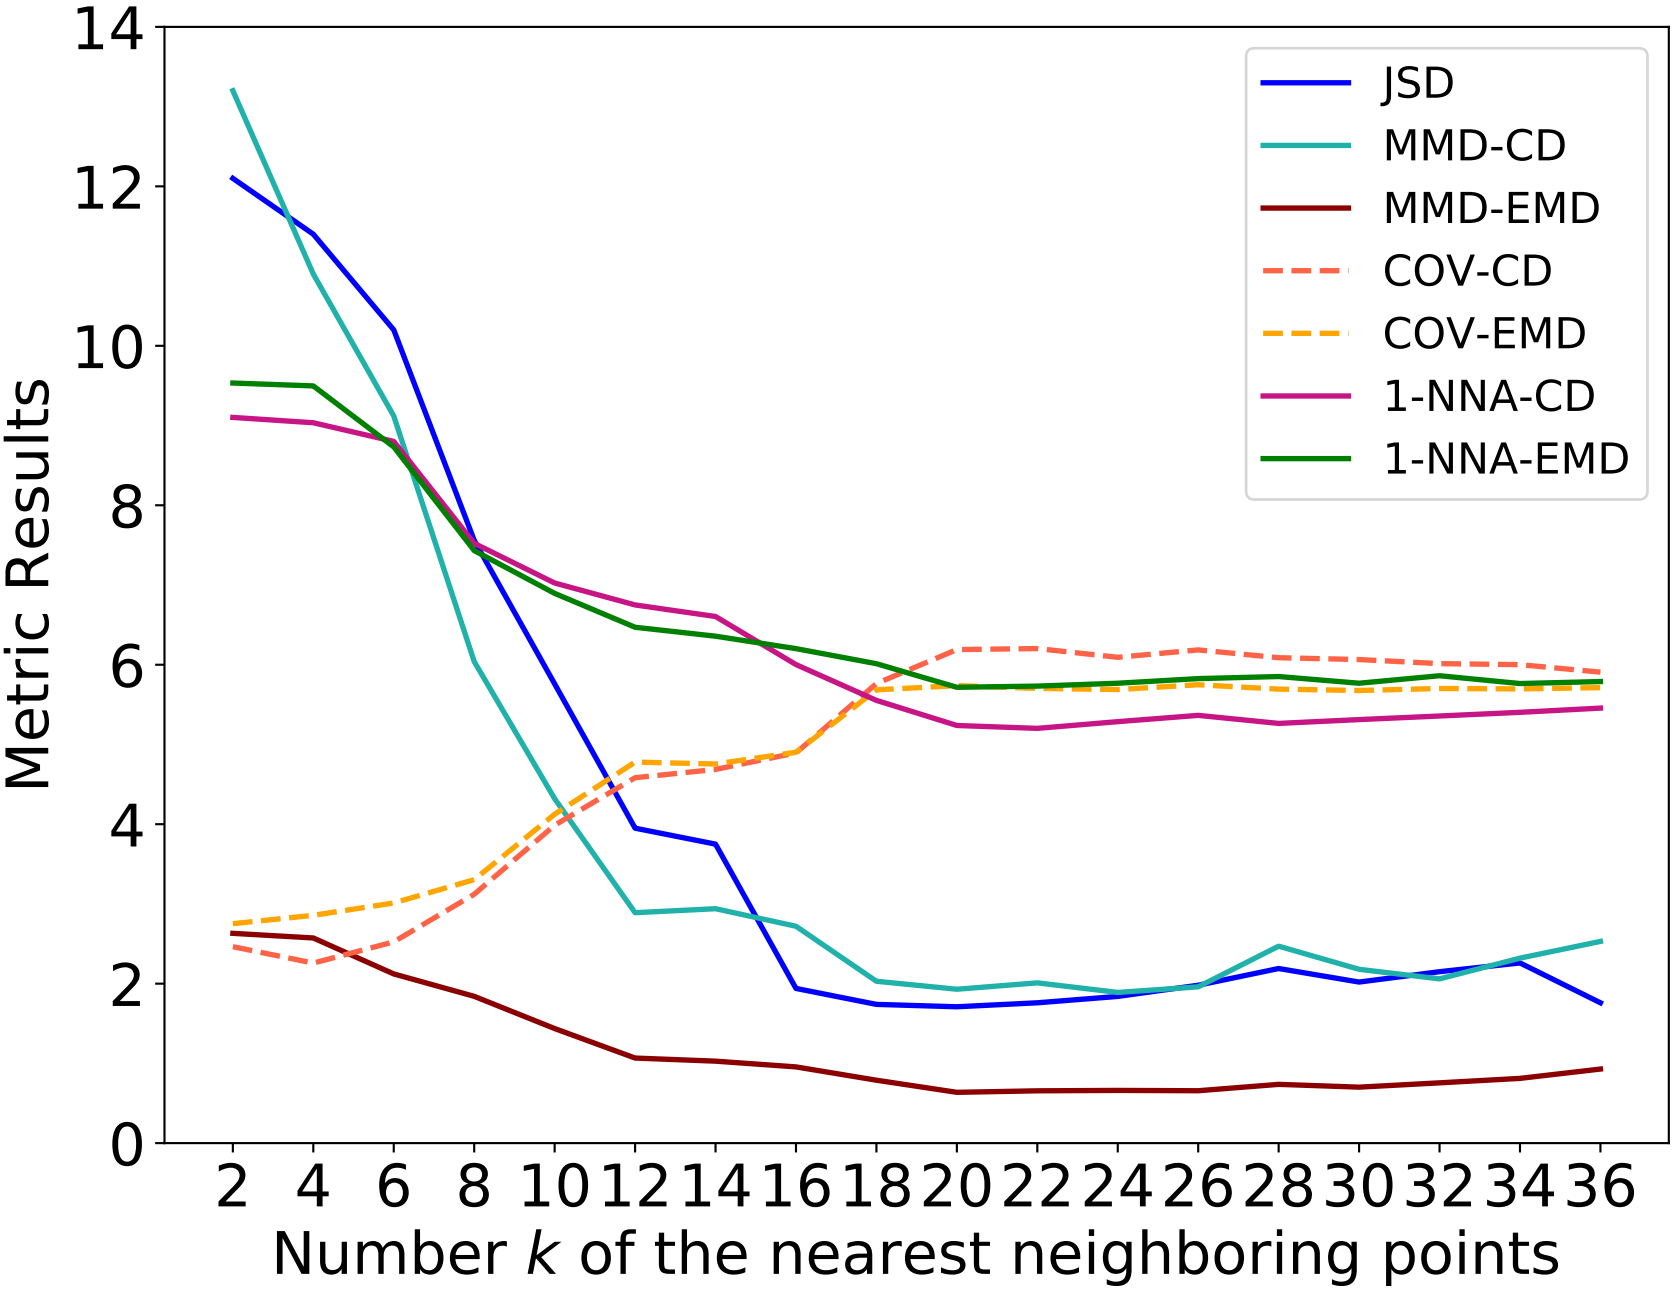

Supplement: Supplementary file 16 [file 123600392-supp.zip]

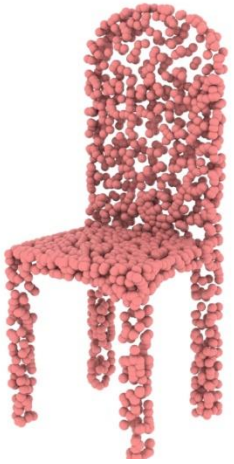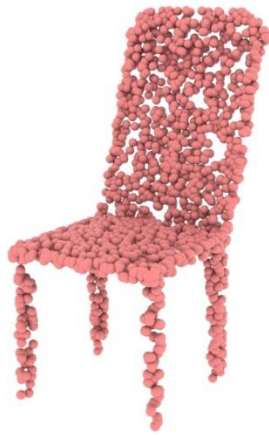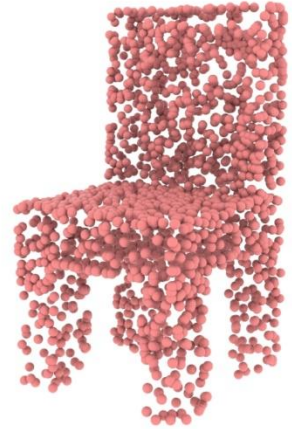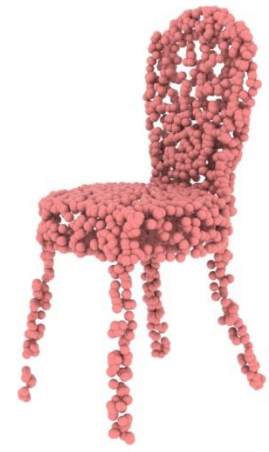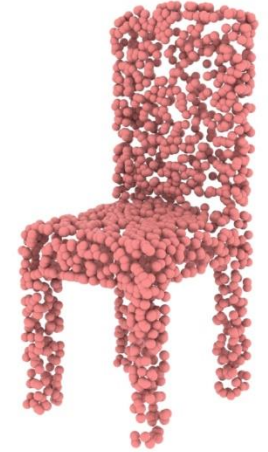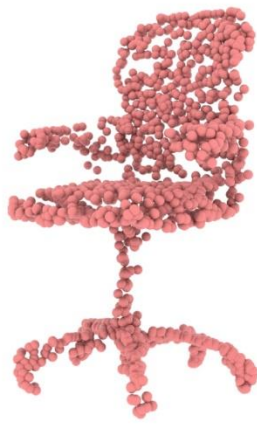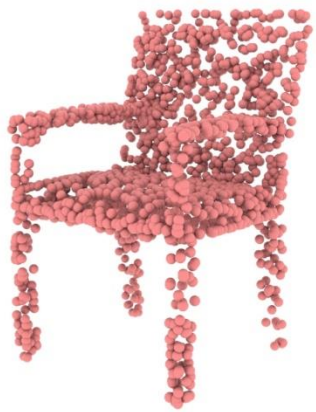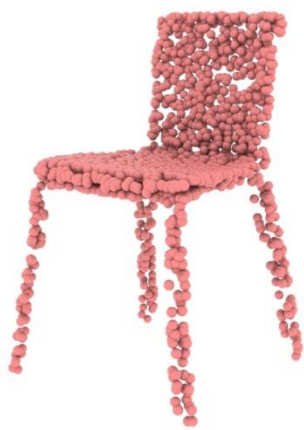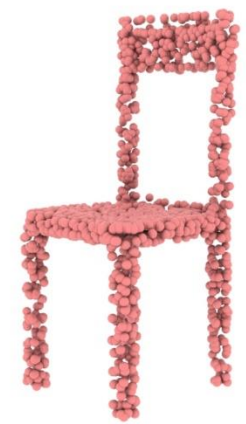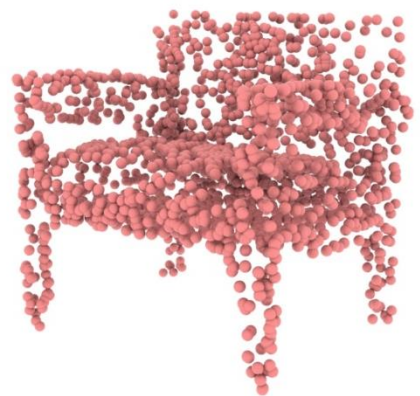

Ours

Supplement: Supplementary file 17 [file 123600392-supp.zip]

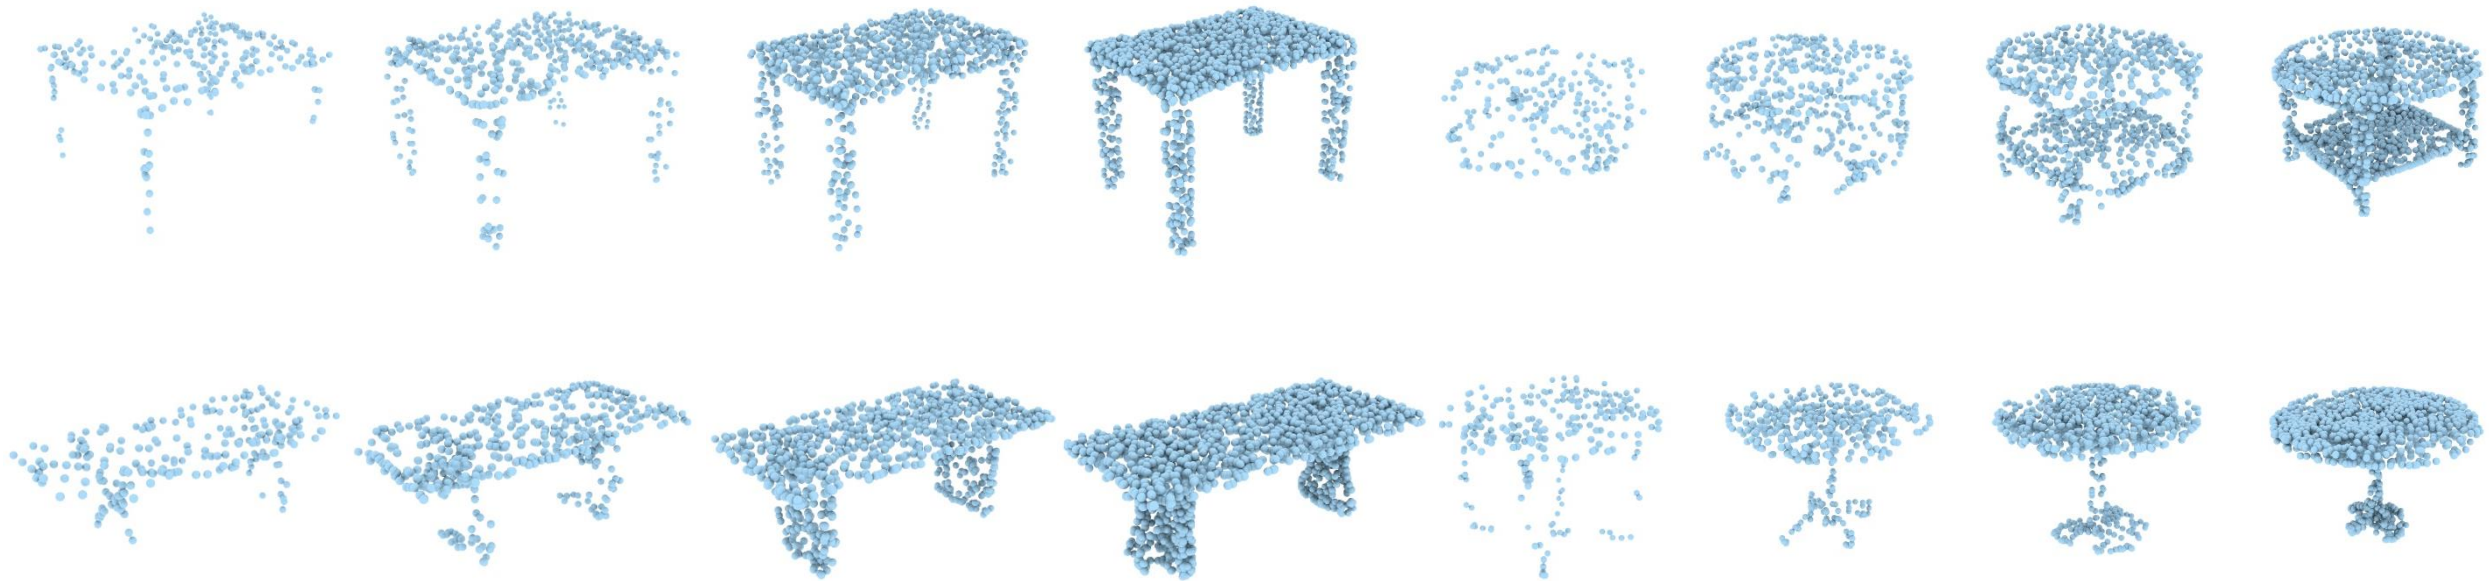

Supplement: Supplementary file 18 [file 123600392-supp.zip]

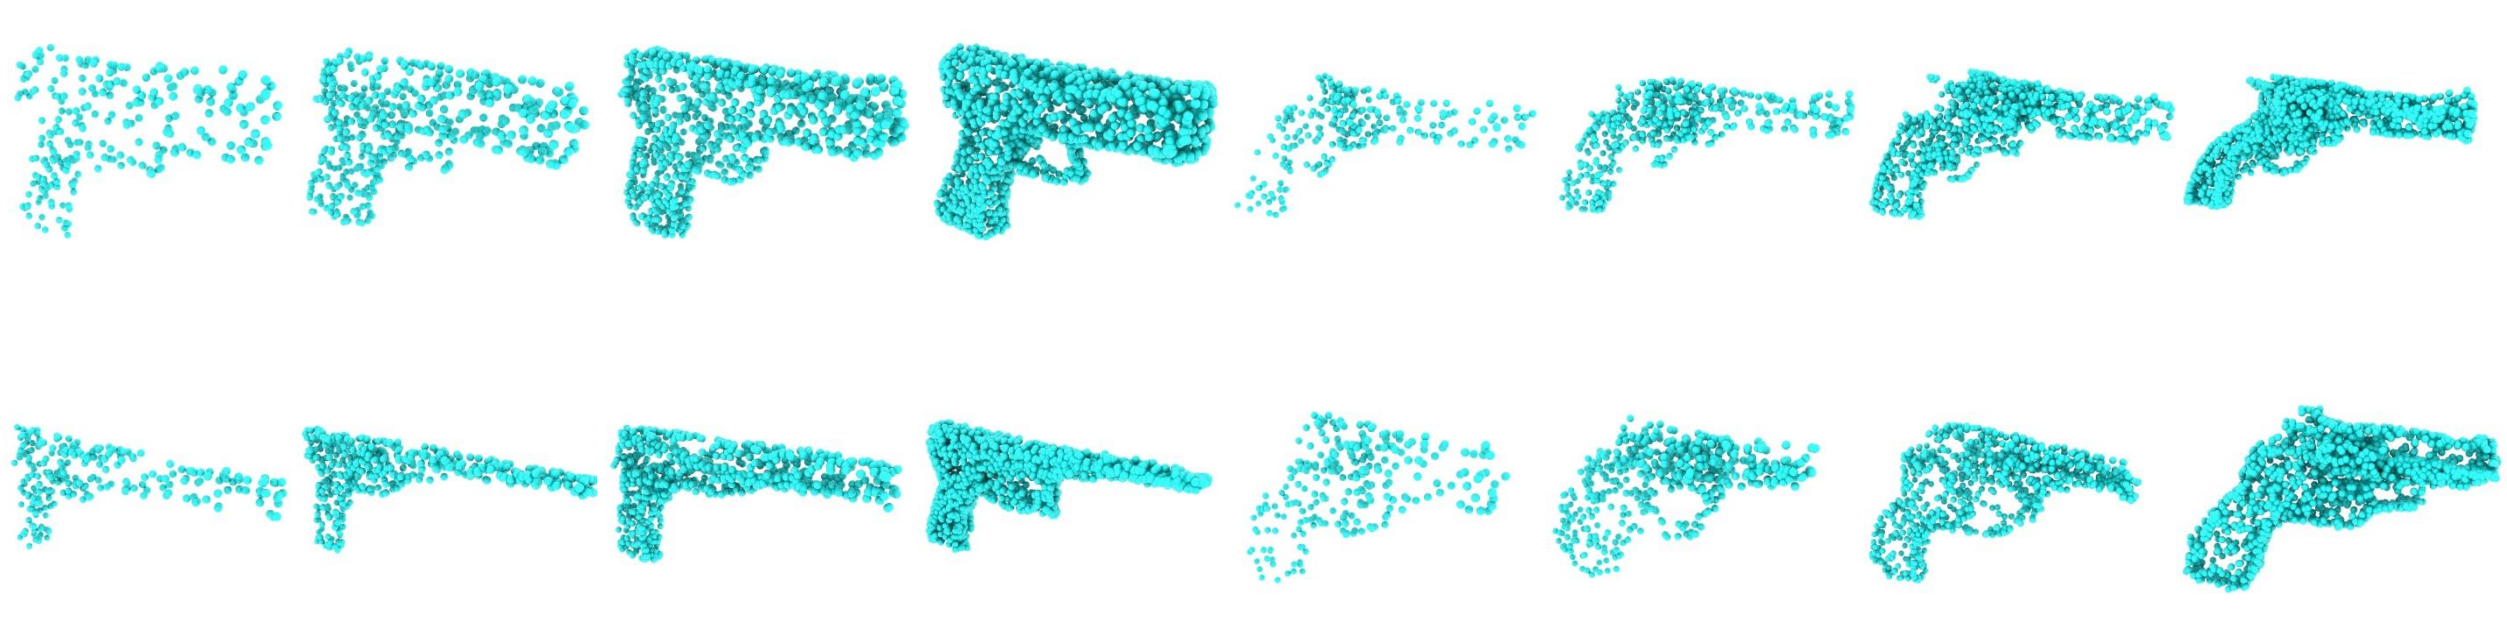

Supplement: Supplementary file 19 [file 123600392-supp.zip]
